# Supplementary material
Source: PubMed Central journal article supplement (PMC3997143)
Supplement: Supp_Table1.pdf [file Supp_Table1.pdf]

## Supplementary Data

SUPPLEMENTARY TABLE S1. LIST OF ANTIBODIES USED IN THE STUDY

| <i>Name</i>                                          | <i>Isotype</i> | <i>Source (catalogue number)</i>                      |
|------------------------------------------------------|----------------|-------------------------------------------------------|
| Isotype control—1B5                                  | IgG1           | Prof. L.K. Ashman (University of Newcastle, NSW, AUS) |
| Isotype control—1D4.5                                | IgG2a          | Prof. L.K. Ashman (University of Newcastle, NSW, AUS) |
| Mouse anti-human CD14                                | IgG2a          | AbD Serotec (MCA1568PET)                              |
| CD29                                                 | IgG1           | (4)                                                   |
| Mouse anti-sheep CD31                                | IgG2a          | AbD Serotec (MCA1097GA)                               |
| CD44                                                 | IgG1           | (4)                                                   |
| Mouse anti-sheep CD45                                | IgG1           | AbD Serotec (MCA2220GA)                               |
| Mouse anti-human CD166                               | IgG1           | BD Pharmigen (559260)                                 |
| HSP90 (STRO4)                                        | IgG1           | (4, 31)                                               |
| Anti-collagen I (COL I)                              | IgG            | Abcam (ab34710)                                       |
| Anti-collagen type II (COL II)                       | IgG1           | Millipore (MAB1330)                                   |
| Bone sialoprotein (BSP)                              | IgG            | Dr. Larry Fisher (NIDCR, NIH, MD, USA)                |
| Osteopontin (OPN)                                    | IgG            | Dr. Larry Fisher (NIDCR, NIH, MD, USA)                |
| Anti-BrdU                                            | IgG            | Abcam (ab1893)                                        |
| Mouse anti-human smooth muscle actin ( $\alpha$ SMA) | IgG2a          | Dako (M0851)                                          |
| Rat anti-mouse Ly-6A/E                               | IgG2a          | BD Pharmigen (557403)                                 |
| Goat anti-mouse IgG-RPE                              | IgG            | Southern Biotech (1030-09)                            |
| Goat anti-rat IgG-RPE                                | IgG            | Southern Biotech (3030-09)                            |

IgG, immunoglobulin G.
